# Supplementary material
Source: HighWire-hosted journal article supplement (https://www.cmajopen.ca/highwire/filestream/81274/field_highwire_adjunct_files/3/2019-0129-Original_submission.pdf)
Supplement: 2019-0129-Original_submission.pdf [file 2019-0129-Original_submission.pdf]

1  
2  
3  
4  
5  
6  
7  
8  
9  
10  
11  
12  
13 Trends in the proportion of women provincial and national residency organization award  
14  
15  
16 recipients across Canada from 2000 to 2018  
17  
18  
19  
20  
21

22 Sarah Silverberg MD<sup>1</sup>, Irene W. Y. Ma MD PhD<sup>2,3</sup> and Shannon M. Ruzycski MD<sup>2,3</sup>  
23  
24  
25  
26  
27  
28  
29  
30  
31  
32  
33  
34

35 <sup>1</sup>Department of Pediatrics, University of British Columbia, Vancouver, British Columbia, Canada  
36  
37

38 <sup>2</sup>Division of General Internal Medicine, University of Calgary, Calgary, Alberta, Canada  
39  
40

41 <sup>3</sup>Department of Community Health Sciences, University of Calgary, Calgary, Alberta, Canada  
42  
43  
44  
45  
46  
47  
48  
49  
50  
51  
52  
53  
54  
55  
56  
57  
58  
59  
60

1  
2  
3 Corresponding author: Shannon M. Ruzycski, Room 1422 Health Sciences Centre, 3330  
4  
5

6 Hospital Drive NW Calgary, Alberta, Canada. Phone: 403-220-7370. Email:  
7  
8

9  
10 shannon.ruzycski@ucalgary.ca  
11  
12  
13  
14  
15

16 Funding: The authors have no funding sources to declare.  
17  
18

19 Conflict of Interest: SS is a member of the Resident Doctors of Canada executive board, but is  
20  
21

22 not involved in awards selection.  
23  
24

25 Word Count: 2,219  
26  
27  
28  
29  
30  
31  
32  
33  
34  
35  
36  
37  
38  
39  
40  
41  
42  
43  
44  
45  
46  
47  
48  
49  
50  
51  
52  
53  
54  
55  
56  
57  
58  
59  
60

Confidential

## ABSTRACT

**Background:** Women physicians are underrepresented in academia, leadership, and administration. Previous evidence suggests that women physicians are evaluated differently than men physicians; this manifests as lower teaching evaluation scores, student evaluation scores, grant attainment, and award distribution. While gender bias has been demonstrated at the level of academic and national research awards, awards selected by resident physicians have not previously been examined.

**Methods:** A cross-sectional analysis of resident-selected awards for residents and staff physicians was conducted from 2000-2018 using data on award distribution from provincial and national residency organizations in Canada. Based on award name and/or description, we classified awards into either education and teaching awards or professionalism, advocacy and wellness awards.

**Results:** Women residents and women staff physicians had significantly lower odds of receiving resident-selected awards than men (OR 0.57, 95% CI 0.39-0.81;  $p < 0.01$  and OR 0.74, 95% CI 0.57-0.95;  $p = 0.02$ , respectively). Compared with men, women had significantly lower odds of receiving education and teaching awards, compared with professionalism, advocacy and

1  
2  
3 wellness awards as residents and staff physicians (OR 0.32, 95% CI 0.11-0.96;  $p < 0.03$  and OR  
4  
5  
6 0.30, 95% CI 0.16-0.53;  $p < 0.0001$ , respectively).  
7  
8

9  
10 **Interpretation:** Between 2000 and 2018, women residents and staff physicians in Canada,  
11  
12 compared to men, had significantly lower odds of receiving awards selected by residents from  
13  
14 provincial and national residency associations. Reasons for possible implicit and explicit bias  
15  
16 influencing evaluation and recognition of women physicians need to be further explored.  
17  
18  
19  
20  
21  
22  
23  
24  
25  
26  
27  
28  
29  
30  
31  
32  
33  
34  
35  
36  
37  
38  
39  
40  
41  
42  
43  
44  
45  
46  
47  
48  
49  
50  
51  
52  
53  
54  
55  
56  
57  
58  
59  
60

Confidential

## INTRODUCTION

The number women admitted to medical schools has exceeded the number of men in both Canada and the United Kingdom for nearly twenty-five years (1, 2). In contrast, men medical students continued to outnumber female medical students in the United States in 2018 (3). Despite over two decades of numerical gender equality in Canadian medical schools, evidence demonstrates that women physicians continue to be underrepresented in academia, leadership, and administration both in Canada and worldwide (4-11). The reasons for this underrepresentation are unclear. Substantial evidence exists that female physicians are held to a higher standard than their male peers in evaluations, assessment, grant applications, academic publishing, and reference letters (12-21). Though there is evidence for explicit bias against women physicians (22-24), the majority of this bias is implicit, manifesting in subtle ways such as word choice when describing trainees and differential access to operating time for female residents (13, 25-30).

Awards from provincial and national residency associations are an opportunity for residents to recognize resident and staff physicians for their contributions to mentorship, education, and advocacy. In addition to increasing the visibility of recipient physicians, these awards may contribute to promotion, hiring, prestige, and recognition (31, 32). For these

1  
2  
3 reasons, if there exists a bias against women physicians in the selection of residency  
4  
5  
6 association awards, this bias may further perpetuate inequities in hiring, promotion, and grant  
7  
8  
9 attainment. Previous studies that have examined award recipients by gender have focused on  
10  
11  
12 those given to staff physicians by national societies (31, 33-36). To our knowledge, resident  
13  
14  
15 nominated awards have not been examined by gender. As such, our study seeks to evaluate  
16  
17  
18 whether men staff and resident physicians are more likely to receive an award from a Canadian  
19  
20  
21 residency association than women physicians.  
22  
23  
24  
25  
26  
27  
28

## 29 **METHODS**

30  
31  
32 We conducted a cross-sectional study of award recipient gender for resident and staff  
33  
34  
35 physicians who received awards from provincial and national residency associations for the  
36  
37  
38 years 2000-2018.  
39  
40  
41

### 42 **Data Source for Staff and Resident Award Recipients**

43  
44  
45 To identify award recipients, we contacted all eight provincial and one national resident  
46  
47  
48 organizations in Canada by email (Resident Doctors of British Columbia, Professional  
49  
50  
51 Association of Resident Physicians of Alberta, Resident Doctors of Saskatchewan, Professional  
52  
53  
54 Association of Residents and Interns of Manitoba, Professional Association of Residents of  
55  
56  
57  
58  
59  
60

1  
2  
3 Ontario, Fédération des Médecins Résidents du Québec, Maritime Resident Doctors, and  
4  
5  
6 Professional Association of Residents of Newfoundland and Labrador and the Resident Doctors  
7  
8  
9 of Canada). If there was no email available or if there was no response to email, we contacted  
10  
11  
12 the organization by telephone. Each organization was contacted a minimum of two times  
13  
14  
15 requesting records of awards given to resident and staff physicians from 2000-2018. Data on  
16  
17  
18 award recipients was also extracted from publicly available sources, including organization  
19  
20  
21 websites, university websites, and the association's official social media accounts (Twitter and  
22  
23  
24 Facebook), where available. We collected the names, faculty status (resident versus staff), year  
25  
26  
27 of award, and award category (teaching, wellness, professionalism, etc).  
28  
29  
30  
31

32 We defined recipient's gender based on the accompanying profile on the organization's  
33  
34  
35 webpage page. If the recipient's gender was not specified, other publicly available records of the  
36  
37  
38 recipient were used to determine gender, including faculty and research laboratory profiles on  
39  
40  
41 university webpages, licensing college archives, obituaries, news interviews, and conference  
42  
43  
44 programs. Individual recipients who received multiple awards were included for each award  
45  
46  
47 received.  
48  
49  
50

### 51 **Data Sources for Staff Physicians**

52  
53  
54  
55  
56  
57  
58  
59  
60

1  
2  
3  
4           The total number of men and women staff physicians eligible to receive awards per year  
5  
6  
7 was determined by two methods. First, we defined faculty physicians by using publicly available  
8  
9  
10 data from the Association of Faculties of Medicine of Canada (37), which provides the number  
11  
12  
13 of female and male physician members of Canadian faculties of medicine. Physicians from  
14  
15  
16 academic faculties are more likely to interact with residents and therefore may more accurately  
17  
18  
19 reflect those were truly eligible to be nominated by residents. This data was available for 2011-  
20  
21  
22 2017. The number of female and male faculty members in Canada for 2000-2011 and 2018 was  
23  
24  
25 extrapolated based on the mean change in numbers of male and female faculty physicians per  
26  
27  
28 year for 2011-2017.  
29  
30

31  
32           To perform sensitivity analyses, we used a second method to estimate the number of  
33  
34  
35 male and female staff physicians eligible to receive awards. In this method, we defined  
36  
37  
38 practicing physicians as the total number of male and female physicians per year practicing in  
39  
40  
41 Canada determined by registration with the Canadian Medical Association (CMA) (38). This  
42  
43  
44 data was available by request for 2005-2018. Data for the years 2000-2004 was extrapolated  
45  
46  
47 using a similar method as described above.  
48  
49  
50

### 51 **Data Sources for Residents**

52  
53  
54  
55  
56  
57  
58  
59  
60



1  
2  
3  
4 The total number of male and female residents per year eligible to win awards at each  
5  
6  
7 university was determined using publicly available data from the Canadian Post-MD Education  
8  
9  
10 Registry (39). Universities with missing award recipient data were excluded from analyses. For  
11  
12  
13 example, data on resident award recipient gender for 2003 was available only from the  
14  
15  
16 University of Toronto and Western University; therefore, we only included male and female  
17  
18  
19 residents registered at University of Toronto and Western University as those eligible to receive  
20  
21  
22 awards for that year.  
23

### 24 25 26 **Award Category**

27  
28  
29 We classified each award into one of two categories: 1) education and teaching; or 2)  
30  
31  
32 professionalism, advocacy and wellness, based on the award name or description on the  
33  
34  
35 residency association website. Some awards were not classifiable based on available  
36  
37  
38 information or did not fit into these two categories (for example, resident research awards). For  
39  
40  
41 analyses based on award category subgroups, we excluded awards that did not clearly indicate  
42  
43  
44 its category subgroup.  
45  
46  
47

### 48 **Statistical Analysis**

49  
50  
51 Odds ratios were defined as the odds of women staff or resident physicians receiving  
52  
53  
54 awards from residency associations compared to the odds of men staff or resident physicians  
55  
56  
57

1  
2  
3 receiving awards. These odds ratios, their exact 95% confidence intervals and two-sided  
4  
5  
6 Fisher's exact p-values were calculated. Linear regression was used to determine the change in  
7  
8  
9 proportion of women receiving awards during the study period. All analyses were performed  
10  
11  
12  
13 using Stata release 15 (StataCorp. 2017, College Station, TX, USA).  
14  
15

## 16 RESULTS

### 17 Staff Physician Award Recipients

18  
19  
20  
21  
22 Data for award recipients were available for at least one year between 2000 and 2018  
23  
24  
25 from seven associations, including six provincial and one national medical residency  
26  
27  
28 associations. One residency association did not issue any awards during the study time period  
29  
30  
31 and one association did not respond to two requests for data. There were 298 individual staff  
32  
33  
34 physician award recipients for the years 2000-2018. A range of 4 and 27 awards were  
35  
36  
37 distributed per year (Table 1).  
38  
39  
40

41  
42 The mean proportion of female recipients for staff physicians per year was 26.3%  $\pm$  SD  
43  
44 11.0%, range: 0% (n=0 of 5 awards, 2006) to 44.4% (n=4 of 9 awards, 2004; Figure 1, Table 1).  
45  
46  
47 In total, for all years combined, 84 staff physician award recipients were women (28.2%). The  
48  
49  
50 proportion of women staff award recipients did not significantly increase during the study period  
51  
52  
53 (change per year 0.4%, 95% CI -0.6% to 1.4%, p=0.42).  
54  
55  
56  
57  
58  
59  
60

1  
2  
3  
4 The odds ratios for women staff physicians receiving residency association awards,  
5  
6  
7 considering only eligible faculty members (based on Association of Faculties of Medicine of  
8  
9  
10 Canada data), is presented in Table 1. The odds of a women staff physician receiving an award  
11  
12  
13 was significantly lower than men physicians (OR 0.74, 95% CI 0.57-0.95;  $p=0.02$ ). This result  
14  
15  
16 did not change when all eligible physicians were practicing physicians based on Canadian  
17  
18  
19 Medical Association data (OR 0.70, 95% CI 0.53-0.92;  $p=0.01$  (data not shown)).  
20  
21

### 22 **Resident Physician Award Recipients**

23  
24  
25  
26 Data was available for resident award recipients from six provincial residency  
27  
28  
29 associations and the national residency association. There were 128 individual resident  
30  
31  
32 physician awards between the years 2002 and 2018. Fifty award recipients were women  
33  
34  
35 resident physicians for the time period analyzed (39.0%). Between 2 and 21 total awards were  
36  
37  
38 distributed per year of analysis (Table 2). The mean proportion of women award recipients each  
39  
40  
41 year was 31.2% (SD 20.6%). Women resident physicians received 0 awards in 2002, 2003,  
42  
43  
44 2004 and 2007 (of two awards each year), and in 2011 (of five awards). Women resident  
45  
46  
47 physicians won greater than 50% of available awards in only one of the 17 years analyzed  
48  
49  
50 (2015,  $n=8$  of 15 awards), despite accounting for greater than 45% of the eligible resident  
51  
52  
53 population every year since 2003 (Figure 2, Table 2). The proportion of women resident  
54  
55  
56  
57  
58  
59  
60

1  
2  
3 physicians receiving awards significantly increased each year during the study period, by 2.5%  
4  
5  
6 per year (95% CI 0.1% to 4.3%,  $p=0.01$ ).  
7  
8  
9

10 Overall, the odds of women residents receiving an award was significantly lower than  
11  
12 men residents (OR 0.57, 95% CI 0.39-0.81,  $p=0.002$ , Table 2).  
13  
14  
15

### 16 **Award Categories**

17

18  
19 The proportion of women staff and resident award recipients separated by award  
20  
21 category is shown in Table 3 and Table 4. For staff physicians, women accounted for 20.7% of  
22  
23 recipients of education and teaching awards ( $n=45$  of 217 awards) and 47.3% of  
24  
25 recipients of professionalism, advocacy & wellness awards ( $n=35$  of 74 awards) from 2000-2018 (Table 3).  
26  
27  
28  
29 The odds of a woman physician receiving an education and teaching award were significantly  
30  
31 lower than receiving a professionalism, advocacy and wellness Award (OR 0.29 95% CI 0.16-  
32  
33 0.53;  $p<0.0001$ ).  
34  
35  
36  
37  
38  
39  
40

41  
42 Similarly, women residents received 27.7% of education and teaching awards ( $n=18$  of  
43  
44 65 awards) and 54.2% of professionalism, advocacy and wellness awards ( $n=13$  of 24; Table  
45  
46  
47 4). The odds of a women resident receiving an education and teaching award were significantly  
48  
49 lower than receiving a professionalism, advocacy and wellness award (OR 0.32, 95% CI 0.11-  
50  
51 0.96;  $p=0.03$ ).  
52  
53  
54  
55  
56  
57  
58  
59  
60

## DISCUSSION

Our study demonstrates that from 2000 to 2018, women physicians had significantly lower odds than men of receiving awards at both the staff and residency levels. There were no years where there were more women staff physician award recipients than men. There were only five years when the proportion of women staff award recipients were greater than the total proportion of eligible women physicians (2013, 2011, 2005, 2004 and 2001). Notably, though women residents have outnumbered men residents in Canada since 2007, the proportion of women resident award recipients never exceeded the proportion of eligible women residents during the study period ((39) Figure 2). Together, these results suggests that women physicians were consistently underrepresented as award recipients relative to their overall proportion in Canada from 2000-2018.

In addition, when women physicians do receive awards, our analyses show that compared with men physicians, women physicians were significantly more likely to receive professionalism, advocacy and wellness awards rather than education and teaching awards. While education and teaching awards are known to be performance measures that are used for promotion decisions, it is less clear what value receiving a wellness award serves in advancing an individual's career (40). In every year of our analyses, women physicians consistently

1  
2  
3 received fewer education and teaching awards than men. This finding is consistent with  
4  
5  
6 literature that demonstrates that woman physicians receive lower ratings on teaching  
7  
8  
9 evaluations than male colleagues; factors that contribute to this phenomenon may be the same  
10  
11  
12 as those present in overall award nomination and selection processes (20), rather than actual  
13  
14  
15 teaching quality. In previous deception studies, students rated teachers that they perceived as  
16  
17  
18 women lower than those they perceived as male, even when the true gender of the instructor  
19  
20  
21 varied (41).  
22  
23  
24  
25

26 Our results are consistent with existing literature on the underrepresentation of women  
27  
28 physicians as award recipients from medical and surgical specialty societies (33-35, 42).  
29  
30  
31

32 Women medical students have also been shown to be less likely to receive an honours  
33  
34 distinction on research thesis than men peers, even when adjusting for mentorship, advanced  
35  
36 degrees, and time spent on the project (43). Overall, our study on resident association awards  
37  
38  
39 adds to the current body of literature suggesting that women physicians are being evaluated  
40  
41  
42 less favourably than men physicians in multiple settings, including on teaching evaluations (20),  
43  
44  
45 student evaluations (13), prestigious research awards (44), and grant applications (21, 45),  
46  
47  
48 although these sex/gender differences are not always consistently demonstrated (46).  
49  
50  
51  
52  
53  
54  
55  
56  
57  
58  
59  
60

1  
2  
3  
4 This study is limited by the small number of awards presented per year. For resident  
5  
6  
7 award recipients in particular, there were fewer than five awards per year prior to 2010. This  
8  
9  
10 limits our power to detect significant differences for individual years. Second, not all residency  
11  
12  
13 organizations kept consistent records of award winners. As well, the number of women and men  
14  
15  
16 physicians in residency, active practice, and faculty members had to be estimated for some  
17  
18  
19 years (2000-2010 and 2018 for staff physicians). Third, we were only able to compare the  
20  
21  
22 proportion of women and men physicians who received awards, but not the proportion of those  
23  
24  
25 who were nominated for awards. Therefore, we are not able to determine if disadvantages faced  
26  
27  
28 by women physicians in receiving awards occurred on the basis of award criteria, nominations,  
29  
30  
31 or in recipient selection processes. Fourth, our data sources did not allow non-binary  
32  
33  
34 categorizations of gender. Finally, without access to the actual awards applications, we cannot  
35  
36  
37 control for the effects of application quality. Nonetheless, given the significant disparities  
38  
39  
40 identified in our study, it would still be prudent for groups that distribute awards to physicians,  
41  
42  
43 residents, and medical students to more closely examine their nomination criteria, processes,  
44  
45  
46 and materials for potential bias. Many organizations have not previously tracked award winners,  
47  
48  
49 and only one has begun monitoring for gender imbalance of nominees or recipients. Best  
50  
51  
52 practice guidelines on how to avoid wording in applications that discourage female applicants  
53  
54  
55  
56  
57  
58  
59  
60

1  
2  
3  
4  
5  
6  
7  
8  
9  
10  
11  
12  
13  
14  
15  
16  
17  
18  
19  
20  
21  
22  
23  
24  
25  
26  
27  
28  
29  
30  
31  
32  
33  
34  
35  
36  
37  
38  
39  
40  
41  
42  
43  
44  
45  
46  
47  
48  
49  
50  
51  
52  
53  
54  
55  
56  
57  
58  
59  
60

may be helpful. We recommend that processes be developed within organizations to foster a more gender equitable nomination pool for awards.

Confidential



## REFERENCES

1. Canada AoFoMo. Canadian Medical Education Statistics. 2018.
2. Moberly T. Number of women entering medical school rises after decade of decline. *BMJ*. 2018;360:k254.
3. AAMC. Current Trends in Medical Education 2019 [Available from: <https://www.aamediversityfactsandfigures2016.org/report-section/section-3/#figure-16>].
4. Association CM. CMA Board of Directors 2019 [Available from: <https://www.cma.ca/cma-board-directors>].
5. Alyono JC, Jackler RK, Chandrasekhar SS. Women of the American Otological Society. *Otol Neurotol*. 2018;39(4S Suppl 1):S69-S80.
6. Bismark M, Morris J, Thomas L, al. e. Reasons and remedies for under-representation of women in medical leadership roles: a qualitative study from Australia. *BMJ Open*. 2015;5(5):e009384.
7. Silver JK, Ghalib R, Poorman JA, Al-Assi D, Parangi S, Bhargava H, et al. Analysis of gender equity in leadership of physician-focused medical specialty societies, 2008-2017. *JAMA Intern Med*. 2019;179(3):433-5.
8. Potvin DA, Burdfield-Steel E, Potvin JM, Heap SM. Diversity begets diversity: A global perspective on gender equality in scientific society leadership. *PLoS One*. 2018;13(5):e0197280.
9. Tricco AC, Thomas SM, Antony J, Rios P, Robson R, Pattani R, et al. Strategies to Prevent or Reduce Gender Bias in Peer Review of Research Grants: A Rapid Scoping Review. *PLoS One*. 2017;12(1):e0169718.
10. Schor NF. The Decanal Divide: Women in Decanal Roles at U.S. Medical Schools. *Acad Med*. 2018;93(2):237-40.

- 1  
2  
3 11. Smith M.S. BN. Equity at Canadian Universities: National Disaggregated, and  
4  
5 Intersectional Data. Academic Women's Association: University of Alberta; 2018.  
6
- 7  
8 12. Klein R, Julian KA, Snyder ED, Koch J, Ufere NN, Volerman A, et al. Gender Bias in  
9  
10 Resident Assessment in Graduate Medical Education: Review of the Literature. *J Gen Intern*  
11  
12 *Med.* 2019.  
13
- 14  
15 13. Mueller AS, Jenkins TM, Osborne M, Dayal A, O'Connor DM, Arora VM. Gender  
16  
17 Differences in Attending Physicians' Feedback to Residents: A Qualitative Analysis. *J Grad Med*  
18  
19 *Educ.* 2017;9(5):577-85.  
20
- 21  
22 14. Turrentine FE, Dreisbach CN, St Ivany AR, Hanks JB, Schroen AT. Influence of Gender  
23  
24 on Surgical Residency Applicants' Recommendation Letters. *J Am Coll Surg.* 2019.  
25
- 26  
27 15. Arya S, Mahendira D, Pattani R. Bilateral Necrotizing Scleritis: A Deeper Look at a  
28  
29 Vision-Threatening Illness. *J Clin Rheumatol.* 2018.  
30
- 31  
32 16. Ley TJ, Hamilton BH. *Sociology.* The gender gap in NIH grant applications. *Science.*  
33  
34 2008;322(5907):1472-4.  
35
- 36  
37 17. Filardo G, da Graca B, Sass DM, Pollock BD, Smith EB, Martinez MA. Trends and  
38  
39 comparison of female first authorship in high impact medical journals: observational study  
40  
41 (1994-2014). *BMJ.* 2016;352:i847.  
42
- 43  
44 18. Tamblyn R, Girard N, Qian CJ, Hanley J. Assessment of potential bias in research grant  
45  
46 peer review in Canada. *CMAJ.* 2018;190(16):E489-E99.  
47
- 48  
49 19. Steinberg JJ, Skae C, Sampson B. Gender gap, disparity, and inequality in peer review.  
50  
51 *Lancet.* 2018;391(10140):2602-3.  
52  
53  
54  
55  
56  
57  
58  
59  
60

- 1  
2  
3 20. Morgan HK, Purkiss JA, Porter AC, Lypson ML, Santen SA, Christner JG, et al. Student  
4 Evaluation of Faculty Physicians: Gender Differences in Teaching Evaluations. *J Womens*  
5 *Health (Larchmt)*. 2016;25(5):453-6.  
6  
7  
8  
9  
10 21. Jagsi R, Griffith KA, Jones RD, Stewart A, Ubel PA. Factors Associated With Success of  
11 Clinician-Researchers Receiving Career Development Awards From the National Institutes of  
12 Health: A Longitudinal Cohort Study. *Acad Med*. 2017;92(10):1429-39.  
13  
14  
15  
16  
17 22. Rangel EL, Smink DS, Castillo-Angeles M, Kwakye G, Changala M, Haider AH, et al.  
18 Pregnancy and Motherhood During Surgical Training. *JAMA Surg*. 2018;153(7):644-52.  
19  
20  
21 23. Sattari M, Serwint JR, Neal D, Chen S, Levine DM. Work-place predictors of duration of  
22 breastfeeding among female physicians. *J Pediatr*. 2013;163(6):1612-7.  
23  
24  
25  
26 24. Weissbart SJ, Stock JA, Wein AJ. Program directors' criteria for selection into urology  
27 residency. *Urology*. 2015;85(4):731-6.  
28  
29  
30  
31 25. Girzadas DV, Jr., Harwood RC, Delis SN, Stevison K, Keng G, Cipparrone N, et al.  
32 Emergency medicine standardized letter of recommendation: predictors of guaranteed match.  
33 *Acad Emerg Med*. 2001;8(6):648-53.  
34  
35  
36  
37 26. Hansen K, Rakic T, Steffens MC. Competent and Warm? *Exp Psychol*. 2017;64(1):27-  
38 36.  
39  
40  
41  
42 27. Jani H, Narmawala W, Ganjawale J. Evaluation of Competencies Related to Personal  
43 Attributes of Resident Doctors by 360 Degree. *J Clin Diagn Res*. 2017;11(6):JC09-JC11.  
44  
45  
46  
47 28. Jong M, Elliott N, Nguyen M, Goyke T, Johnson S, Cook M, et al. Assessment of  
48 Emergency Medicine Resident Performance in an Adult Simulation Using a Multisource  
49 Feedback Approach. *West J Emerg Med*. 2019;20(1):64-70.  
50  
51  
52  
53  
54  
55  
56  
57  
58  
59  
60

- 1  
2  
3 29. Pattani R, Marquez C, Dinyarian C, Sharma M, Bain J, Moore JE, et al. The perceived  
4 organizational impact of the gender gap across a Canadian department of medicine and proposed  
5 strategies to combat it: a qualitative study. *BMC Med.* 2018;16(1):48.  
6  
7  
8  
9  
10 30. Suson KD, Wolfe-Christensen C, Elder JS, Lakshmanan Y. Differences in early career  
11 operative experiences among pediatric urologists. *J Pediatr Urol.* 2018;14(4):333 e1- e7.  
12  
13  
14 31. Silver JK, Slocum CS, Bank AM, Bhatnagar S, Blauwet CA, Poorman JA, et al. Where  
15 Are the Women? The Underrepresentation of Women Physicians Among Recognition Award  
16 Recipients From Medical Specialty Societies. *PM R.* 2017;9(8):804-15.  
17  
18  
19  
20 32. Huggett KN, Greenberg RB, Rao D, Richards B, Chauvin SW, Fulton TB, et al. The  
21 design and utility of institutional teaching awards: a literature review. *Med Teach.*  
22 2012;34(11):907-19.  
23  
24  
25  
26 33. Silver JK, Bank AM, Slocum CS, Blauwet CA, Bhatnagar S, Poorman JA, et al. Women  
27 physicians underrepresented in American Academy of Neurology recognition awards.  
28 *Neurology.* 2018;91(7):e603-e14.  
29  
30  
31  
32  
33 34. Silver JK, Bhatnagar S, Blauwet CA, Zafonte RD, Mazwi NL, Slocum CS, et al. Female  
34 Physicians Are Underrepresented in Recognition Awards from the American Academy of  
35 Physical Medicine and Rehabilitation. *PM R.* 2017;9(10):976-84.  
36  
37  
38  
39  
40 35. Silver JK, Blauwet CA, Bhatnagar S, Slocum CS, Tenforde AS, Schneider JC, et al.  
41 Women Physicians Are Underrepresented in Recognition Awards From the Association of  
42 Academic Physiatrists. *Am J Phys Med Rehabil.* 2018;97(1):34-40.  
43  
44  
45  
46  
47 36. Krzyzaniak S. GM, Parsons M., Rocca N., Chan T.M. What emergency medicine  
48 rewards: is there implicit gender bias in national awards? *Annals of Emergency Medicine.*  
49 2019;In press.  
50  
51  
52  
53  
54  
55  
56  
57  
58  
59  
60

- 1  
2  
3 37. Canada AoFoMi. Canadian Medical Education Statistics 2018. 2018 Accessed June 4  
4  
5 2019.  
6
- 7  
8 38. Association CM. Number and changing demographics of Canada's physicians over the  
9  
10 years. CMA/Joule 2018.  
11
- 12 39. CAPER/RCEP. Census Data Tables. Canadian Post-MD Education Registry; 2019  
13  
14 Accessed June 4 2019.  
15
- 16  
17 40. Simpson D, Hafler J., Brown D., Wilkerson L. Documentation systems for educators  
18  
19 seeking academic promotion in US medical schools. *Academic Medicine*. 2004;79:783-90.  
20
- 21 41. Hunt LMADAN. What's in a Name: Exposing Gender Bias in Student  
22  
23 Ratings of Teaching. *Innovative Higher Education*. 2015;40:291-303.  
24
- 25  
26 42. Lyons NB, Bernardi K, Huang L, Holihan JL, Cherla D, Martin AC, et al. Gender  
27  
28 Disparity in Surgery: An Evaluation of Surgical Societies. *Surg Infect (Larchmt)*. 2019.  
29
- 30  
31 43. King JT, Jr., Angoff NR, Forrest JN, Jr., Justice AC. Gender Disparities in Medical  
32  
33 Student Research Awards: A 13-Year Study From the Yale School of Medicine. *Acad Med*.  
34  
35 2018;93(6):911-9.  
36
- 37  
38 44. Carnes M, Geller S, Fine E, Sheridan J, Handelsman J. NIH Director's Pioneer Awards:  
39  
40 could the selection process be biased against women? *J Womens Health (Larchmt)*.  
41  
42 2005;14(8):684-91.  
43
- 44  
45 45. Gordon MB, Osganian SK, Emans SJ, Lovejoy FH, Jr. Gender differences in research  
46  
47 grant applications for pediatric residents. *Pediatrics*. 2009;124(2):e355-61.  
48
- 49  
50 46. Kalyani RR, Yeh HC, Clark JM, Weisfeldt ML, Choi T, MacDonald SM. Sex  
51  
52 Differences Among Career Development Awardees in the Attainment of Independent Research  
53  
54 Funding in a Department of Medicine. *J Womens Health (Larchmt)*. 2015;24(11):933-9.  
55  
56  
57  
58  
59  
60

1  
2  
3  
4  
5  
6  
7  
8  
9  
10  
11  
12  
13  
14  
15  
16  
17  
18  
19  
20  
21  
22  
23  
24  
25  
26  
27  
28  
29  
30  
31  
32  
33  
34  
35  
36  
37  
38  
39  
40  
41  
42  
43  
44  
45  
46  
47  
48  
49  
50  
51  
52  
53  
54  
55  
56  
57  
58  
59  
60

Confidential

**Table 1.** Number and proportion of women and men faculty physician recipients of an award from a Canadian residency association compared to the number and proportion of eligible faculty physicians (Association of Faculties of Medicine of Canada data) from 2000-2018.

| <b>Year</b> | <b>Total Number of Eligible Faculty Physicians</b> | <b>Number of Women Award Winners<br/>(% of total awards)</b> | <b>Total number of Women Faculty Physicians<br/>(% of eligible physicians)</b> | <b>Number of Men Award Winners<br/>(% of total awards)</b> | <b>Total number of Men Faculty Physicians<br/>(% of eligible physicians)</b> |
|-------------|----------------------------------------------------|--------------------------------------------------------------|--------------------------------------------------------------------------------|------------------------------------------------------------|------------------------------------------------------------------------------|
| 2018*       | 13,932                                             | 9 (33.3)                                                     | 5,418 (38.9)                                                                   | 18 (66.6)                                                  | 8,514 (61.1)                                                                 |
| 2017        | 13,505                                             | 6 (30.0)                                                     | 5,201 (38.5)                                                                   | 14 (70.0)                                                  | 8,304 (61.5)                                                                 |
| 2016        | 13,048                                             | 4 (23.5)                                                     | 4,859 (37.2)                                                                   | 13 (76.4)                                                  | 8,189 (62.8)                                                                 |
| 2015        | 12,878                                             | 7 (30.4)                                                     | 4,776 (37.1)                                                                   | 16 (69.6)                                                  | 8,102 (62.9)                                                                 |
| 2014        | 12,604                                             | 5 (22.7)                                                     | 4,644 (36.8)                                                                   | 17 (77.3)                                                  | 7,960 (63.2)                                                                 |
| 2013        | 11,521                                             | 7 (36.8)                                                     | 4,175 (36.2)                                                                   | 12 (63.2)                                                  | 7,346 (63.8)                                                                 |
| 2012        | 11,205                                             | 8 (32.0)                                                     | 3,993 (35.6)                                                                   | 17 (68.0)                                                  | 7,212 (64.4)                                                                 |
| 2011        | 10,717                                             | 9 (39.1)                                                     | 3,777 (35.2)                                                                   | 14 (60.9)                                                  | 6,940 (64.8)                                                                 |
| 2010*       | 10,506                                             | 3 (16.7)                                                     | 3,776 (35.9)                                                                   | 15 (83.3)                                                  | 6,730 (64.1)                                                                 |
| 2009*       | 10,079                                             | 2 (13.3)                                                     | 3,559 (35.5)                                                                   | 13 (86.7)                                                  | 6,520 (64.5)                                                                 |
| 2008*       | 9,652                                              | 5 (26.3)                                                     | 3,342 (34.6)                                                                   | 14 (73.7)                                                  | 6,310 (65.4)                                                                 |
| 2007*       | 9,225                                              | 4 (28.6)                                                     | 3,125 (33.9)                                                                   | 10 (71.4)                                                  | 6,100 (66.1)                                                                 |
| 2006*       | 8,798                                              | 0                                                            | 2,908 (33.1)                                                                   | 5 (100.0)                                                  | 5,890 (66.9)                                                                 |
| 2005*       | 8,371                                              | 4 (33.3)                                                     | 2,691 (32.1)                                                                   | 8 (66.7)                                                   | 5,680 (67.9)                                                                 |
| 2004*       | 7,944                                              | 4 (44.4)                                                     | 2,474 (31.1)                                                                   | 5 (55.6)                                                   | 5,470 (68.9)                                                                 |
| 2003*       | 7,517                                              | 1 (11.1)                                                     | 2,257 (30.0)                                                                   | 8 (88.9)                                                   | 5,260 (70.0)                                                                 |
| 2002*       | 7,090                                              | 4 (36.3)                                                     | 2,040 (28.8)                                                                   | 7 (63.4)                                                   | 5,050 (71.2)                                                                 |
| 2001*       | 6,663                                              | 1 (16.7)                                                     | 1,823 (27.4)                                                                   | 5 (83.3)                                                   | 4,840 (72.6)                                                                 |
| 2000*       | 6,236                                              | 1 (25.0)                                                     | 1,606 (25.8)                                                                   | 3 (75.0)                                                   | 4,630 (74.2)                                                                 |

|               |                |                  |                      |                   |                       |
|---------------|----------------|------------------|----------------------|-------------------|-----------------------|
| <b>Total*</b> | <b>191,491</b> | <b>84 (28.2)</b> | <b>66,444 (34.7)</b> | <b>214 (71.8)</b> | <b>125,047 (65.3)</b> |
|---------------|----------------|------------------|----------------------|-------------------|-----------------------|

\*Contains estimates where data was not available and the number of men and women faculty physicians were extrapolated.

Confidential

1  
2  
3  
4  
5  
6  
7  
8  
9  
10  
11  
12  
13  
14  
15  
16  
17  
18  
19  
20  
21  
22  
23  
24  
25  
26  
27  
28  
29  
30  
31  
32  
33  
34  
35  
36  
37  
38  
39  
40  
41  
42  
43  
44  
45  
46  
47



**Table 2** Number and proportion of women and men resident physician recipients of an award from a Canadian residency association compared to the number and proportion of eligible resident physicians from 2000-2018.

| Year  | Total Number of Eligible Resident Physicians | Number of Female Resident Award Winners<br>(% of total awards) | Number of Female Residents          | Number of Male Resident Award Winners | Number of Male Residents            |
|-------|----------------------------------------------|----------------------------------------------------------------|-------------------------------------|---------------------------------------|-------------------------------------|
|       |                                              |                                                                | (% of eligible resident physicians) | (% of total awards)                   | (% of eligible resident physicians) |
| 2018* | 14,128                                       | 8 (38.1)                                                       | 7,502 (53.1)                        | 13 (61.9)                             | 6,626 (61.9)                        |
| 2017* | 14,045                                       | 7 (41.2)                                                       | 7,449 (53.0)                        | 10 (58.8)                             | 6,596 (47.0)                        |
| 2016* | 13,999                                       | 7 (43.8)                                                       | 7,474 (53.4)                        | 9 (56.3)                              | 6,525 (46.6)                        |
| 2015* | 13,685                                       | 8 (53.3)                                                       | 7,393 (54.0)                        | 7 (46.7)                              | 6,292 (46.0)                        |
| 2014* | 13,379                                       | 5 (45.5)                                                       | 7,314 (54.7)                        | 6 (54.5)                              | 6,065 (45.3)                        |
| 2013* | 12,951                                       | 4 (40.0)                                                       | 7,034 (54.3)                        | 6 (60.0)                              | 5,917 (45.7)                        |
| 2012* | 12,467                                       | 3 (42.9)                                                       | 6,785 (54.4)                        | 4 (57.1)                              | 5,682 (45.6)                        |
| 2011† | 4,256                                        | 0                                                              | 2,180 (51.2)                        | 5 (100.0)                             | 2,076 (48.8)                        |
| 2010* | 11,081                                       | 3 (50.0)                                                       | 5,945 (53.7)                        | 3 (50.0)                              | 5,136 (46.3)                        |
| 2009‡ | 3,306                                        | 2 (50.0)                                                       | 1,713 (51.8)                        | 2 (50.0)                              | 1,593 (48.2)                        |
| 2008‡ | 3,078                                        | 1 (33.3)                                                       | 1,594 (51.8)                        | 2 (66.7)                              | 1,484 (48.2)                        |

1  
2  
3  
4  
5  
6  
7  
8  
9  
10  
11  
12  
13  
14  
15  
16  
17  
18  
19  
20  
21  
22  
23  
24  
25  
26  
27  
28  
29  
30  
31  
32  
33  
34  
35  
36  
37  
38  
39  
40  
41  
42  
43  
44  
45  
46  
47

|                    |                |                  |                      |                  |                      |
|--------------------|----------------|------------------|----------------------|------------------|----------------------|
| 2007 <sup>§</sup>  | 2,482          | 0                | 998 (40.2)           | 2 (100.0)        | 1,005 (59.8)         |
| 2006 <sup>§</sup>  | 1,892          | 1 (50.0)         | 934 (49.4)           | 1 (50.0)         | 958 (50.60)          |
| 2005 <sup>‡</sup>  | 2,492          | 1 (33.3)         | 1,203 (48.3)         | 2 (66.7)         | 1,289 (51.7)         |
| 2004 <sup>§</sup>  | 1,725          | 0                | 778 (45.1)           | 2 (100.0)        | 947 (54.9)           |
| 2003 <sup>§</sup>  | 1,673          | 0                | 747 (44.7)           | 2 (100.0)        | 926 (55.3)           |
| 2002 <sup>  </sup> | 353            | 0                | 126 (35.7)           | 2 (100.0)        | 227 (64.3)           |
| <b>Total</b>       | <b>126,513</b> | <b>50 (39.0)</b> | <b>67,169 (53.1)</b> | <b>78 (60.9)</b> | <b>59,344 (46.9)</b> |

\* All Canadian residents included.

† Includes residents from Western University, University of Toronto, University of British Columbia and University of Manitoba

‡ Includes residents from Western University, University of Toronto, and University of British Columbia

§ Includes residents from Western University and University of Toronto

|| Includes Western University data

Confidential

Table 3. Number of women staff physician recipients for awards from Canadian resident associations by award category between 2000-2018.

| Year | Education & Teaching Awards |                             | Professionalism, Advocacy & Wellness Awards |                             | All Award Types |                             |
|------|-----------------------------|-----------------------------|---------------------------------------------|-----------------------------|-----------------|-----------------------------|
|      | Total Awards                | Number of Women Winners (%) | Total Awards                                | Number of Woman Winners (%) | Total Awards    | Number of Woman Winners (%) |
| 2018 | 20                          | 5 (25.0)                    | 7                                           | 4 (57.1)                    | 27              | 9 (33.3)                    |
| 2017 | 15                          | 2 (13.3)                    | 5                                           | 4 (80.0)                    | 20              | 6 (30.0)                    |
| 2016 | 12                          | 1 (8.3)                     | 5                                           | 3 (60.0)                    | 17              | 4 (23.5)                    |
| 2015 | 17                          | 6 (35.3)                    | 6                                           | 1 (16.7)                    | 23              | 7 (30.4)                    |
| 2014 | 16                          | 5 (31.3)                    | 6                                           | 0                           | 22              | 5 (22.7)                    |
| 2013 | 14                          | 3 (21.4)                    | 5                                           | 4 (80.0)                    | 19              | 7 (36.8)                    |
| 2012 | 17                          | 2 (11.8)                    | 6                                           | 6 (100.0)                   | 25              | 8 (32.0)                    |
| 2011 | 17                          | 6 (35.3)                    | 6                                           | 3 (50.0)                    | 23              | 9 (39.1)                    |
| 2010 | 13                          | 1 (7.7)                     | 5                                           | 2 (40.0)                    | 18              | 3 (16.7)                    |
| 2009 | 11                          | 2 (18.2)                    | 4                                           | 0                           | 15              | 2 (13.3)                    |
| 2008 | 15                          | 2 (13.3)                    | 4                                           | 3 (75.0)                    | 19              | 5 (26.3)                    |
| 2007 | 11                          | 3 (27.3)                    | 3                                           | 1 (33.3)                    | 14              | 4 (28.6)                    |
| 2006 | 3                           | 0                           | 2                                           | 0                           | 5               | 0                           |
| 2005 | 10                          | 3 (30.0)                    | 2                                           | 1 (50.0)                    | 12              | 4 (33.3)                    |
| 2004 | 7                           | 2 (28.6)                    | 2                                           | 2 (100.0)                   | 6               | 4 (44.4)                    |
| 2003 | 6                           | 0                           | 2                                           | 0                           | 9               | 1 (11.1)                    |
| 2002 | 7                           | 3 (42.9)                    | 3                                           | 1 (33.3)                    | 11              | 4 (36.4)                    |

1  
2  
3  
4  
5  
6  
7  
8  
9  
10  
11  
12  
13  
14  
15  
16  
17  
18  
19  
20  
21  
22  
23  
24  
25  
26  
27  
28  
29  
30  
31  
32  
33  
34  
35  
36  
37  
38  
39  
40  
41  
42  
43  
44  
45  
46  
47

|              |            |                  |           |                  |            |                  |
|--------------|------------|------------------|-----------|------------------|------------|------------------|
| 2001         | 5          | 0                | 0         | n/a*             | 6          | 1 (16.7)         |
| 2000         | 1          | 0                | 1         | 0                | 4          | 1 (25.0)         |
| <b>Total</b> | <b>217</b> | <b>45 (20.7)</b> | <b>74</b> | <b>35 (47.3)</b> | <b>298</b> | <b>84 (28.2)</b> |

\* n/a denotes not available

Confidential

Table 4. Number of women resident physician recipients for awards from Canadian resident associations by award category between 2002-2018.

| Year | Education & Teaching Awards |                             | Professionalism, Advocacy & Wellness Awards |                             | All Award Types |                             |
|------|-----------------------------|-----------------------------|---------------------------------------------|-----------------------------|-----------------|-----------------------------|
|      | Total Awards                | Number of Women Winners (%) | Total Awards                                | Number of Woman Winners (%) | Total Awards    | Number of Woman Winners (%) |
| 2018 | 10                          | 3 (33.3)                    | 5                                           | 1 (20.0)                    | 21              | 8 (38.1)                    |
| 2017 | 8                           | 1 (12.5)                    | 4                                           | 2 (50.0)                    | 17              | 7 (41.2)                    |
| 2016 | 6                           | 1 (16.7)                    | 4                                           | 4 (100.0)                   | 16              | 7 (43.8)                    |
| 2015 | 6                           | 3 (50.0)                    | 3                                           | 2 (66.7)                    | 15              | 8 (53.5)                    |
| 2014 | 4                           | 2 (50.0)                    | 2                                           | 2 (100.0)                   | 11              | 5 (45.5)                    |
| 2013 | 3                           | 1 (33.3)                    | 2                                           | 1 (50.0)                    | 10              | 4 (40.0)                    |
| 2012 | 4                           | 1 (25.)                     | 2                                           | 2 (100.0)                   | 7               | 3 (42.9)                    |
| 2011 | 3                           | 0                           | 1                                           | 0                           | 5               | 0                           |
| 2010 | 4                           | 3 (75.0)                    | 1                                           | 0                           | 6               | 3 (50.0)                    |
| 2009 | 3                           | 1 (33.3)                    | 0                                           | n/a*                        | 4               | 2 (50.0)                    |
| 2008 | 2                           | 0                           | 0                                           | n/a*                        | 3               | 1 (33.3)                    |
| 2007 | 2                           | 0                           | 0                                           | n/a*                        | 2               | 0                           |
| 2006 | 2                           | 1 (50.0)                    | 0                                           | n/a*                        | 2               | 1 (50.0)                    |
| 2005 | 2                           | 1 (50.0)                    | 0                                           | n/a*                        | 3               | 1 (33.3)                    |
| 2004 | 2                           | 0                           | 0                                           | n/a*                        | 2               | 0                           |
| 2003 | 2                           | 0                           | 0                                           | n/a*                        | 2               | 0                           |
| 2002 | 2                           | 0                           | 0                                           | n/a*                        | 2               | 0                           |

|              |           |                  |           |                  |            |                  |
|--------------|-----------|------------------|-----------|------------------|------------|------------------|
| <b>Total</b> | <b>65</b> | <b>18 (27.7)</b> | <b>24</b> | <b>13 (54.2)</b> | <b>128</b> | <b>50 (39.1)</b> |
|--------------|-----------|------------------|-----------|------------------|------------|------------------|

\* n/a denotes not available

1  
2  
3  
4  
5  
6  
7  
8  
9  
10  
11  
12  
13  
14  
15  
16  
17  
18  
19  
20  
21  
22  
23  
24  
25  
26  
27  
28  
29  
30  
31  
32  
33  
34  
35  
36  
37  
38  
39  
40  
41  
42  
43  
44  
45  
46  
47

Confidential

Figure 1. Proportion of Canadian residency association award recipients who were women staff physicians (orange) per year compared to the proportion of medicine faculty members who were women (blue, based on Association of Faculties of Medicine of Canada data) and the proportion of practicing physicians who were women (grey, based on Canadian Medical Association data) in Canada from 2000-2018.

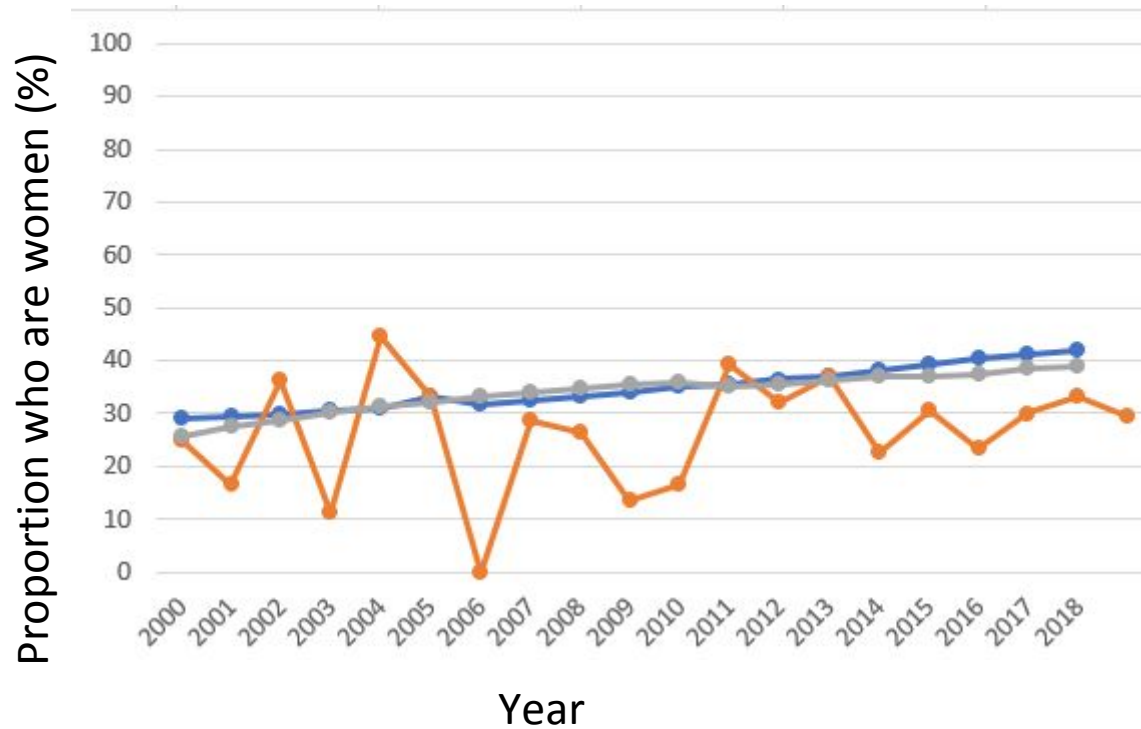

1  
2  
3  
4  
5  
6  
7  
8  
9  
10  
11  
12  
13  
14  
15  
16  
17  
18  
19  
20  
21  
22  
23  
24  
25  
26  
27  
28  
29  
30  
31  
32  
33  
34  
35  
36  
37  
38  
39  
40  
41  
42  
43  
44  
45  
46  
47

Figure 2. Proportion of Canadian residency award recipients who were women resident physicians (orange) per year compared to the proportion of Canadian residents who were women (blue) in Canada from 2002-2018.

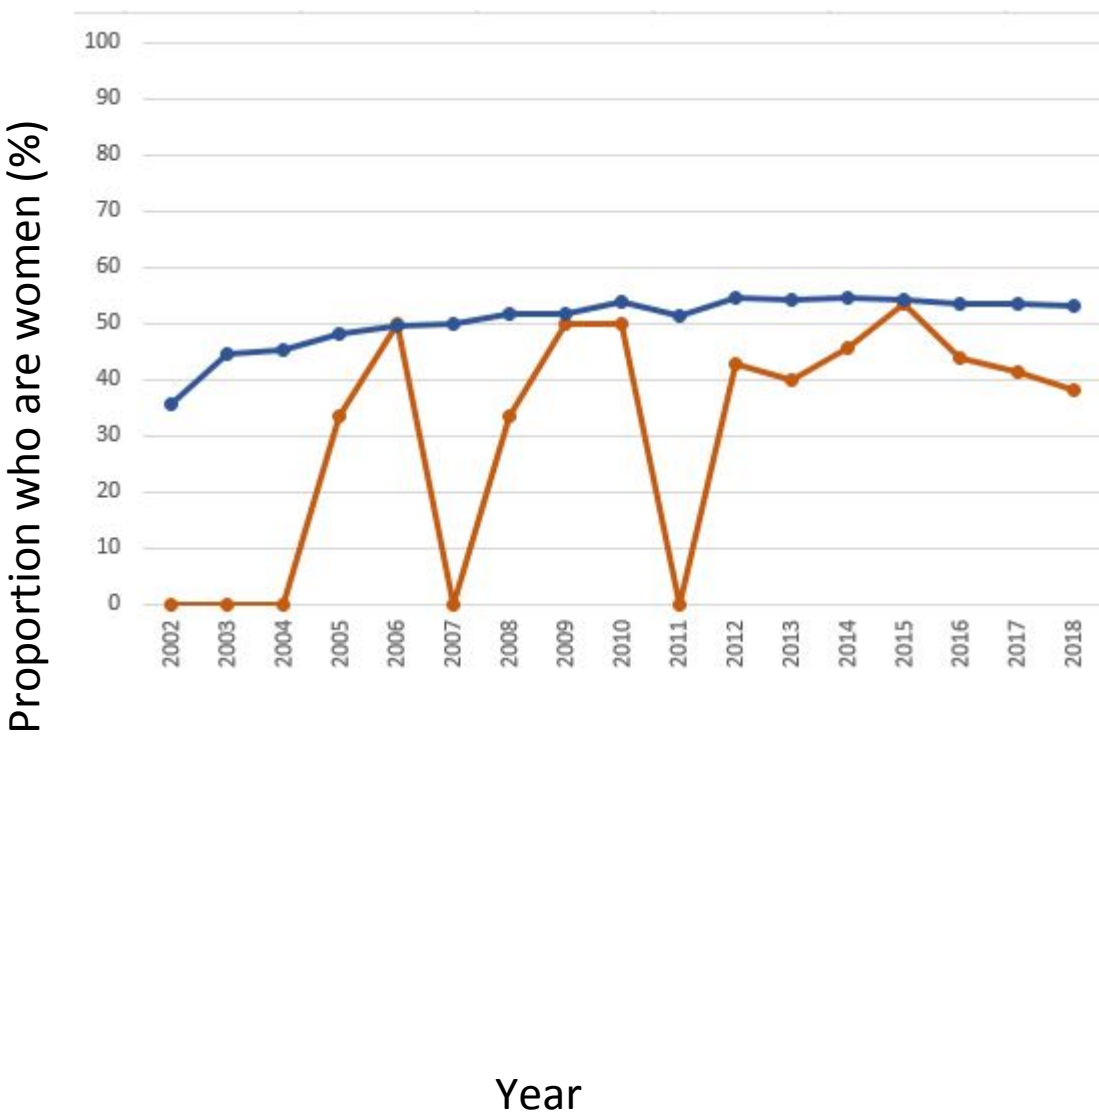



Confidential

1  
2  
3  
4  
5  
6  
7  
8  
9  
10  
11  
12  
13  
14  
15  
16  
17  
18  
19  
20  
21  
22  
23  
24  
25  
26  
27  
28  
29  
30  
31  
32  
33  
34  
35  
36  
37  
38  
39  
40  
41  
42  
43  
44  
45  
46  
47

1  
2  
3  
4  
5  
6  
7  
8  
9  
10  
11  
12  
13  
14  
15  
16  
17  
18  
19  
20  
21  
22  
23  
24  
25  
26  
27  
28  
29  
30  
31  
32  
33  
34  
35  
36  
37  
38  
39  
40  
41  
42  
43  
44  
45  
46  
47  
48  
49  
50  
51  
52  
53  
54  
55  
56  
57  
58  
59  
60STROBE Statement—Checklist of items that should be included in reports of *cross-sectional studies*

|                              | Item No | Recommendation                                                                                                                                                                                               | Page No    |
|------------------------------|---------|--------------------------------------------------------------------------------------------------------------------------------------------------------------------------------------------------------------|------------|
| <b>Title and abstract</b>    | 1       | (a) Indicate the study's design with a commonly used term in the title or the abstract                                                                                                                       | 1          |
|                              |         | (b) Provide in the abstract an informative and balanced summary of what was done and what was found                                                                                                          | 2          |
| <b>Introduction</b>          |         |                                                                                                                                                                                                              |            |
| Background/rationale         | 2       | Explain the scientific background and rationale for the investigation being reported                                                                                                                         | 3          |
| Objectives                   | 3       | State specific objectives, including any prespecified hypotheses                                                                                                                                             | 3          |
| <b>Methods</b>               |         |                                                                                                                                                                                                              |            |
| Study design                 | 4       | Present key elements of study design early in the paper                                                                                                                                                      | 4          |
| Setting                      | 5       | Describe the setting, locations, and relevant dates, including periods of recruitment, exposure, follow-up, and data collection                                                                              | 4          |
| Participants                 | 6       | (a) Give the eligibility criteria, and the sources and methods of selection of participants                                                                                                                  | 4          |
| Variables                    | 7       | Clearly define all outcomes, exposures, predictors, potential confounders, and effect modifiers. Give diagnostic criteria, if applicable                                                                     | 4-5        |
| Data sources/<br>measurement | 8*      | For each variable of interest, give sources of data and details of methods of assessment (measurement). Describe comparability of assessment methods if there is more than one group                         | 4-5        |
| Bias                         | 9       | Describe any efforts to address potential sources of bias                                                                                                                                                    | 4          |
| Study size                   | 10      | Explain how the study size was arrived at                                                                                                                                                                    | 4          |
| Quantitative variables       | 11      | Explain how quantitative variables were handled in the analyses. If applicable, describe which groupings were chosen and why                                                                                 | 5          |
| Statistical methods          | 12      | (a) Describe all statistical methods, including those used to control for confounding                                                                                                                        | 5          |
|                              |         | (b) Describe any methods used to examine subgroups and interactions                                                                                                                                          | 4-5        |
|                              |         | (c) Explain how missing data were addressed                                                                                                                                                                  | 4          |
|                              |         | (d) If applicable, describe analytical methods taking account of sampling strategy                                                                                                                           | 5          |
|                              |         | (e) Describe any sensitivity analyses                                                                                                                                                                        | 4-5        |
| <b>Results</b>               |         |                                                                                                                                                                                                              |            |
| Participants                 | 13*     | (a) Report numbers of individuals at each stage of study—eg numbers potentially eligible, examined for eligibility, confirmed eligible, included in the study, completing follow-up, and analysed            | 6          |
|                              |         | (b) Give reasons for non-participation at each stage                                                                                                                                                         | n/a        |
|                              |         | (c) Consider use of a flow diagram                                                                                                                                                                           | n/a        |
| Descriptive data             | 14*     | (a) Give characteristics of study participants (eg demographic, clinical, social) and information on exposures and potential confounders                                                                     | 6-7        |
|                              |         | (b) Indicate number of participants with missing data for each variable of interest                                                                                                                          | Table 1, 2 |
| Outcome data                 | 15*     | Report numbers of outcome events or summary measures                                                                                                                                                         | 6-7        |
| Main results                 | 16      | (a) Give unadjusted estimates and, if applicable, confounder-adjusted estimates and their precision (eg, 95% confidence interval). Make clear which confounders were adjusted for and why they were included | 7          |

|                          |    |                                                                                                                                                                            |     |
|--------------------------|----|----------------------------------------------------------------------------------------------------------------------------------------------------------------------------|-----|
|                          |    | (b) Report category boundaries when continuous variables were categorized                                                                                                  | y   |
|                          |    | (c) If relevant, consider translating estimates of relative risk into absolute risk for a meaningful time period                                                           | n/a |
| Other analyses           | 17 | Report other analyses done—eg analyses of subgroups and interactions, and sensitivity analyses                                                                             | 7   |
| <b>Discussion</b>        |    |                                                                                                                                                                            |     |
| Key results              | 18 | Summarise key results with reference to study objectives                                                                                                                   | 7-8 |
| Limitations              | 19 | Discuss limitations of the study, taking into account sources of potential bias or imprecision. Discuss both direction and magnitude of any potential bias                 | 8-9 |
| Interpretation           | 20 | Give a cautious overall interpretation of results considering objectives, limitations, multiplicity of analyses, results from similar studies, and other relevant evidence | 9   |
| Generalisability         | 21 | Discuss the generalisability (external validity) of the study results                                                                                                      | 9   |
| <b>Other information</b> |    |                                                                                                                                                                            |     |
| Funding                  | 22 | Give the source of funding and the role of the funders for the present study and, if applicable, for the original study on which the present article is based              | 1   |

\*Give information separately for exposed and unexposed groups.

**Note:** An Explanation and Elaboration article discusses each checklist item and gives methodological background and published examples of transparent reporting. The STROBE checklist is best used in conjunction with this article (freely available on the Web sites of PLoS Medicine at <http://www.plosmedicine.org/>, Annals of Internal Medicine at <http://www.annals.org/>, and Epidemiology at <http://www.epidem.com/>). Information on the STROBE Initiative is available at [www.strobe-statement.org](http://www.strobe-statement.org).
